# Supplementary material for: The carbon footprint of beef transport in Colombia: market connections and distribution networks
Source: Frontiers journal article supplement (doi:10.3389/fsufs.2024.1416629), 2024-09-25

## Supplementary material: The carbon footprint of beef transport in Colombia: market connections and distribution networks

Castillo, Johana Marcela<sup>1</sup>; González, Carlos Eduardo<sup>1</sup>; Lienert, Anja<sup>1/2</sup>; Flórez, Jesús Fernando<sup>1</sup>; Bravo Parra, Aura María<sup>1</sup>; Triana Ángel, Natalia<sup>1</sup>; Burkart, Stefan<sup>1\*</sup>

<sup>1</sup> International Center for Tropical Agriculture (CIAT), Cali, Colombia

<sup>2</sup> University of Hohenheim, Stuttgart, Germany

\*Corresponding author: Dr. Stefan Burkart, [s.burkart@cgiar.org](mailto:s.burkart@cgiar.org)

**Supplementary Figure 1.** GHG emissions in beef markets

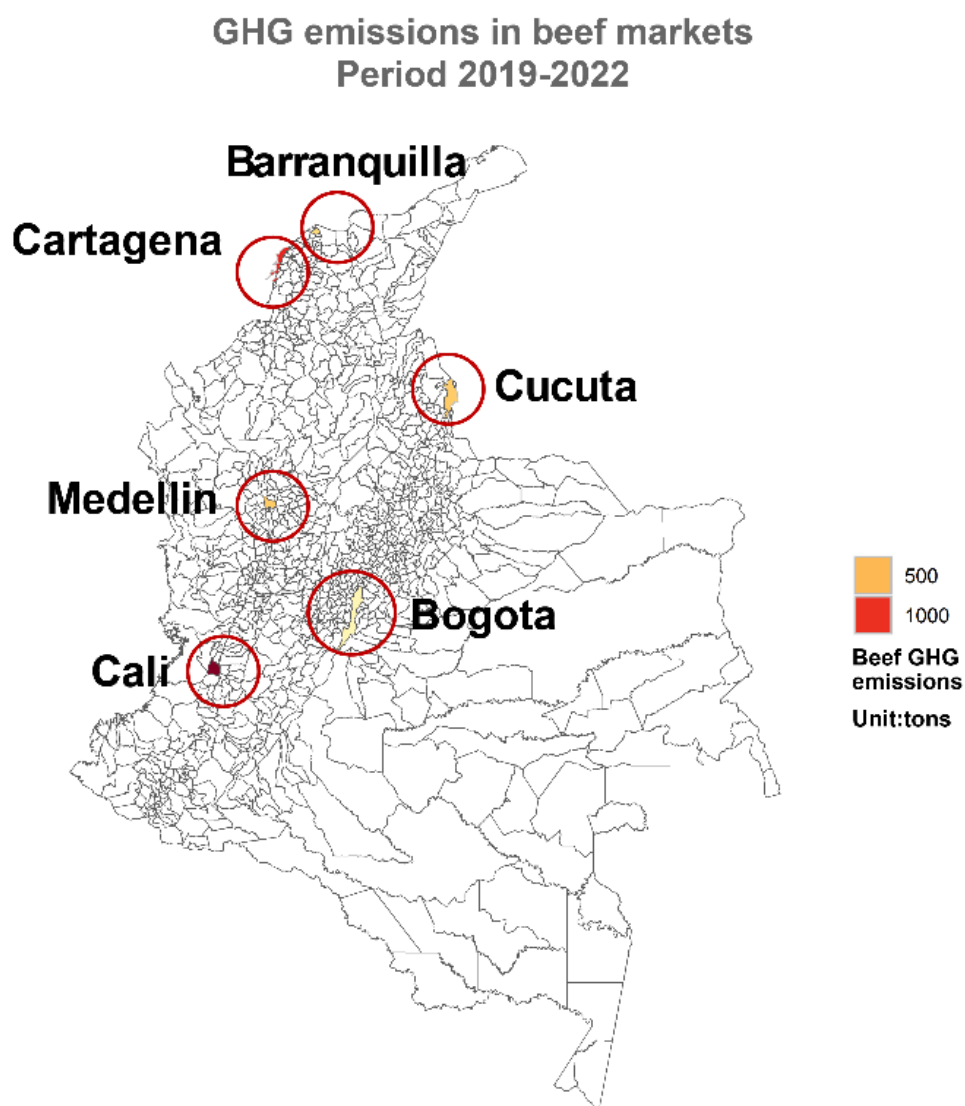

Supplementary Figure 2. GHG emissions in poultry markets

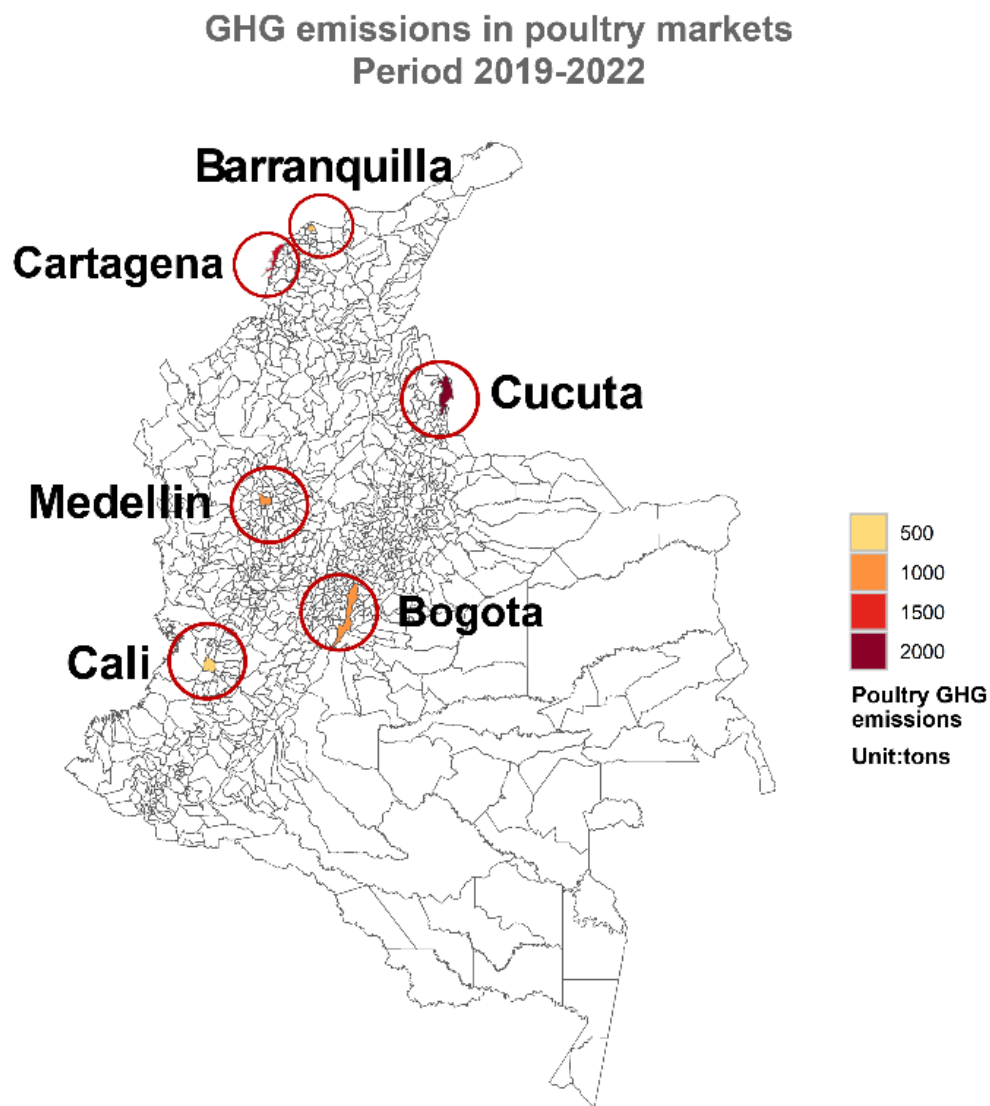

Supplementary Figure 3. GHG emissions in pork markets

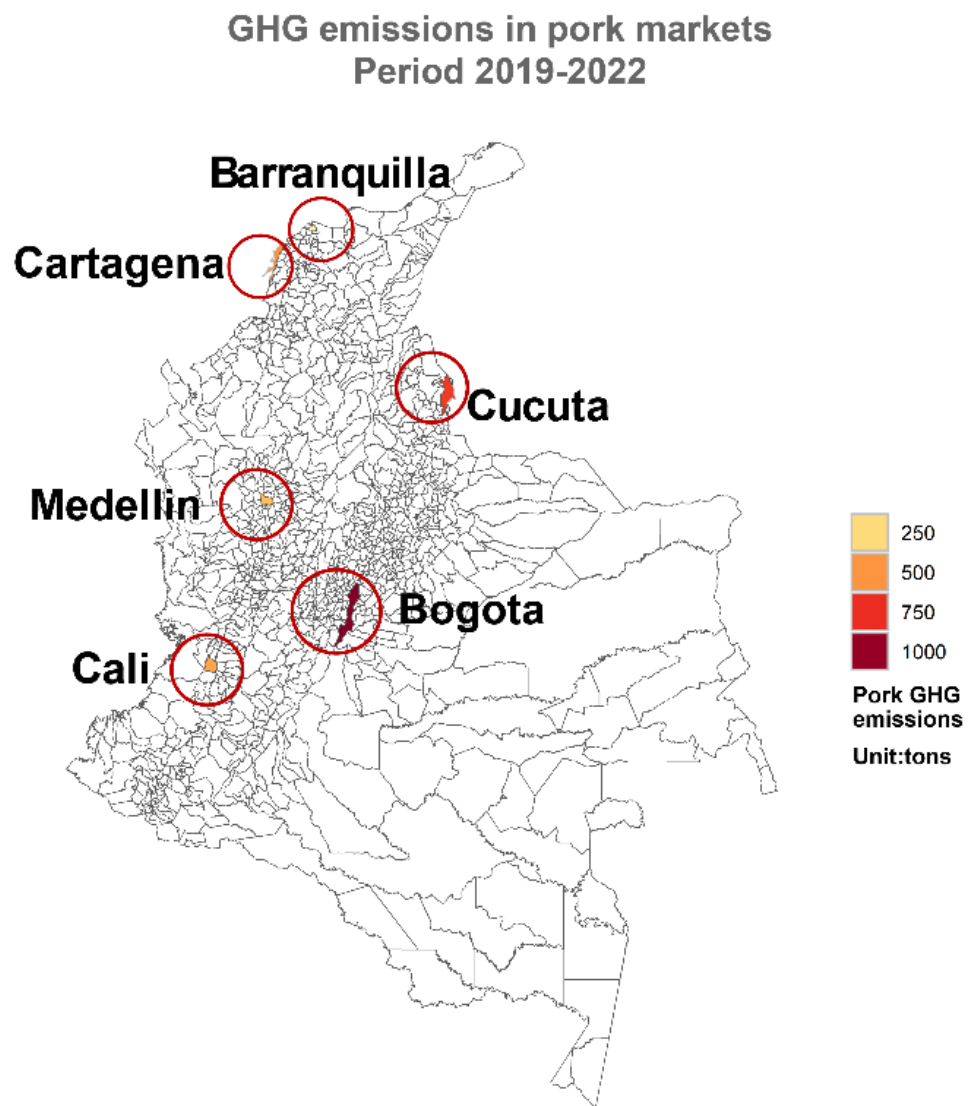

Supplementary Figure 4. Largest beef markets

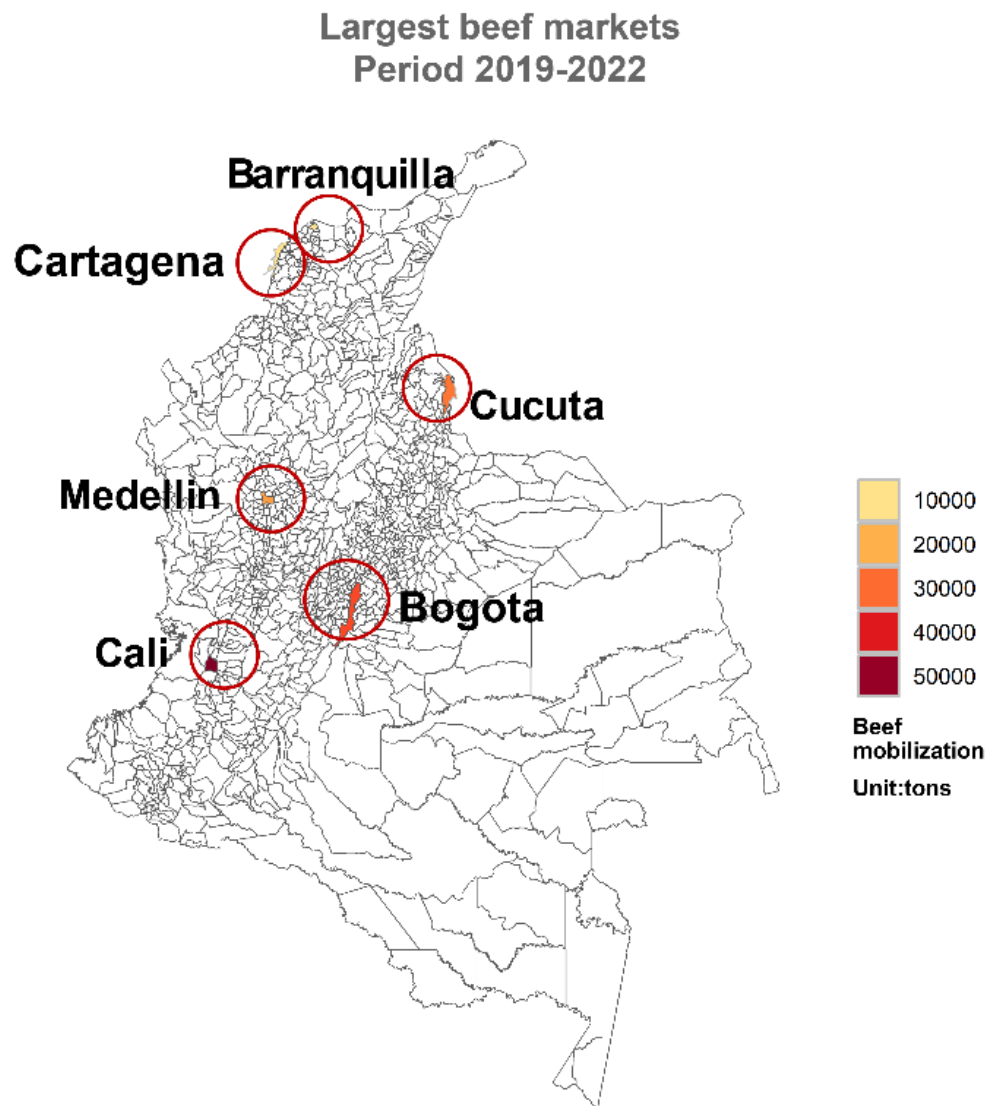

Supplementary Figure 5. Largest poultry markets

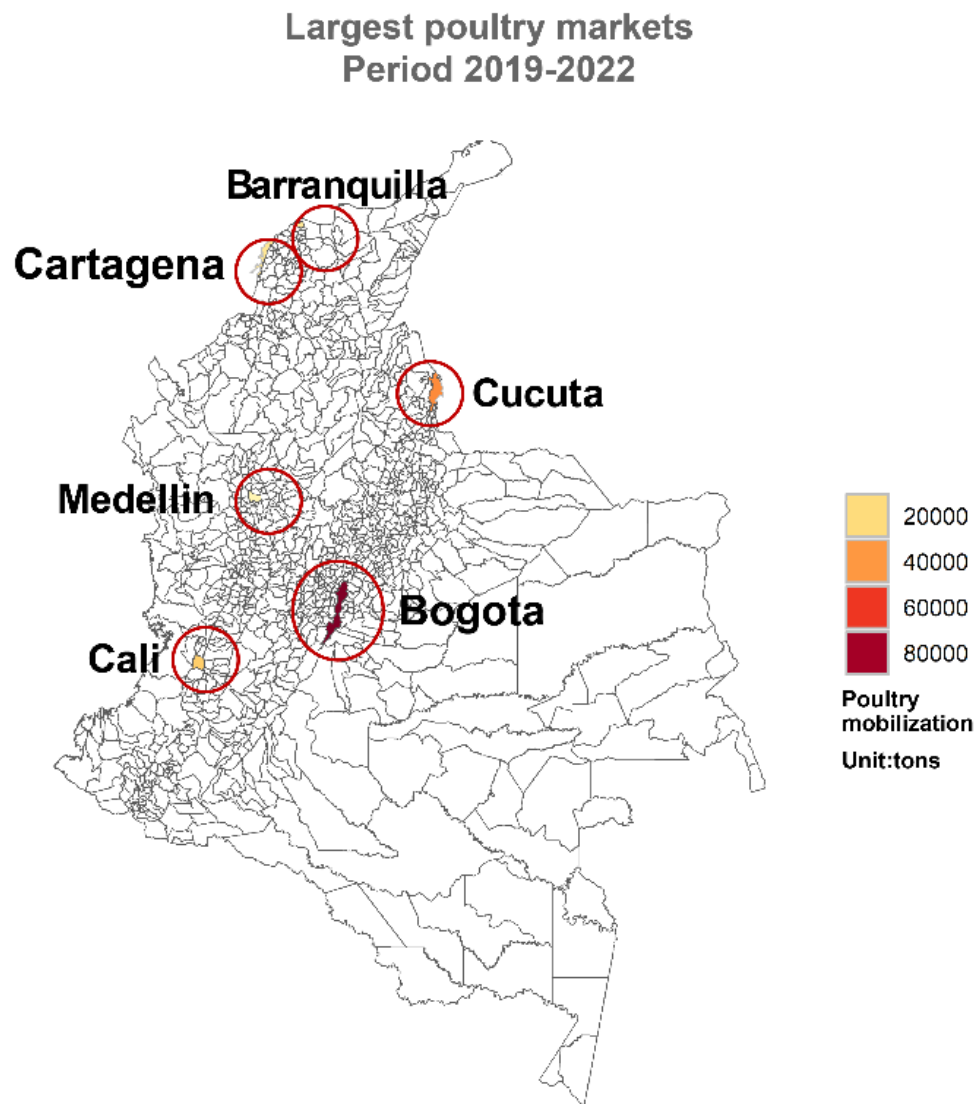

Supplementary Figure 6. Largest pork markets

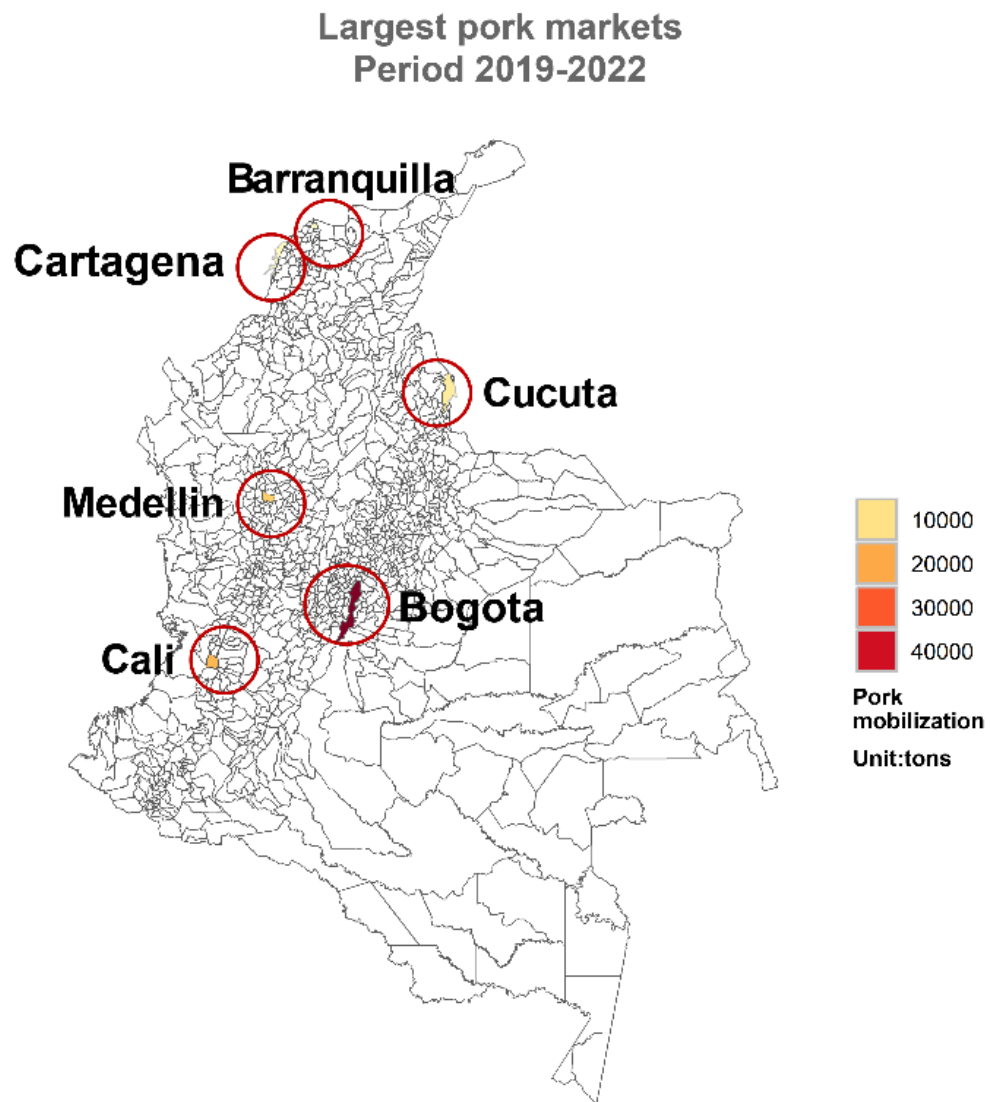

Supplement: Data_Sheet_1.pdf [file Data_Sheet_1.pdf]
